# Supplementary material for: Water and soil loss from landslide deposits as a function of gravel content in the Wenchuan earthquake area, China, revealed by artificial rainfall simulations
Source: PLOS journal article supplement (doi:10.1371/journal.pone.0196657), 2018-05-03
Supplement: S2 (10.1371/journal.pone.0196657.s002) [file journal.pone.0196657.s002]

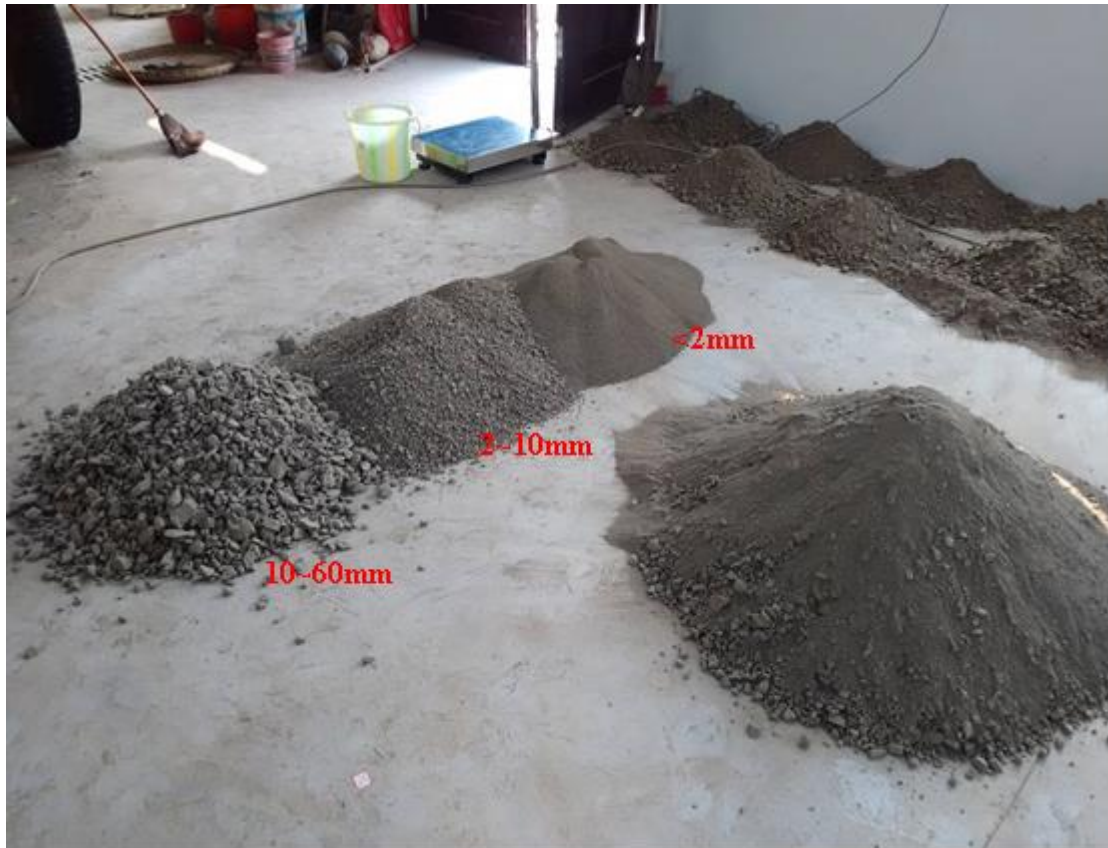

S1 Figure. samples of different particle diameter
